# Supplementary material for: Systematic evaluation of analytical methods for CSF proteomics
Source: Research Square preprint supplement (doi:10.21203/rs.3.rs-7031998/v1), 2025-07-15
Supplement: Supplementary file 6 [file f61cfd5b05088dd6fb7ed537.docx]

**Supplementary Figure Legends**

**Supplementary Figure 1**

1. Clustered heatmap of pair-wise Spearman correlation coefficients for the three technical replicates generated with the P20-EV and P150-EV ultracentrifugation protocols (cohort 2).
2. Boxplot depicting the number of proteins detected per technical replicate for P150-EVs and P20-EVs in cohort 2.
3. Nanoparticle-tracking analysis of P20-EV fractions: particle-size distribution and concentration for CSF-derived EVs (solid blue line) compared with urine-derived EVs (black dashed line).
4. Equivalent analysis for P150-EV fractions (CSF, solid purple; urine, black dashed); Wilcoxon P-values for between-biofluid comparisons are indicated in each panel.

**Supplementary Figure 2**

1. Boxplot showing the median log2 median abundance for each method. Individual dots represent the CSF samples analysed.
2. Histograms showing the distribution of median peptide counts per protein for each workflow.

**Supplementary Figure 3**

1. Heatmap of pair-wise Spearman correlations between the per-sample mean protein abundances obtained with each enrichment workflow.
2. Binary (detected / not-detected) heatmap of all protein groups, hierarchically clustered; column colours indicate the corresponding workflow.
3. Dot plot highlighting CNS-enriched markers (left panel) and the ten most abundant CSF proteins (right panel). Dot colour reflects the median log₂ intensity, whereas dot size denotes the percentage of patient samples in which the protein was identified for each workflow.

**Supplementary Data**

**Data S1.** Clinical characteristics of study participants.

**Data S2.** Mass spec data acquisition parameters.

**Data S3.** Processed proteomic profiles of CSF samples.

**Data S4.** Results from subcellular localization, related to figure 4E.

**Data S5.** Results from functional enrichment analysis, related to figure 4F.
